# Supplementary material for: Frequency-Invariant Representation of Interaural Time Differences in Mammals
Source: PubMed Central journal article supplement (PMC3060160; doi:10.1371/journal.pcbi.1002013), 2011-03-17
Supplement: pcbi.1002013.s001.pdf [file pcbi.1002013.s001.pdf]

**Figure S1: Robustness of single cell mutual information**

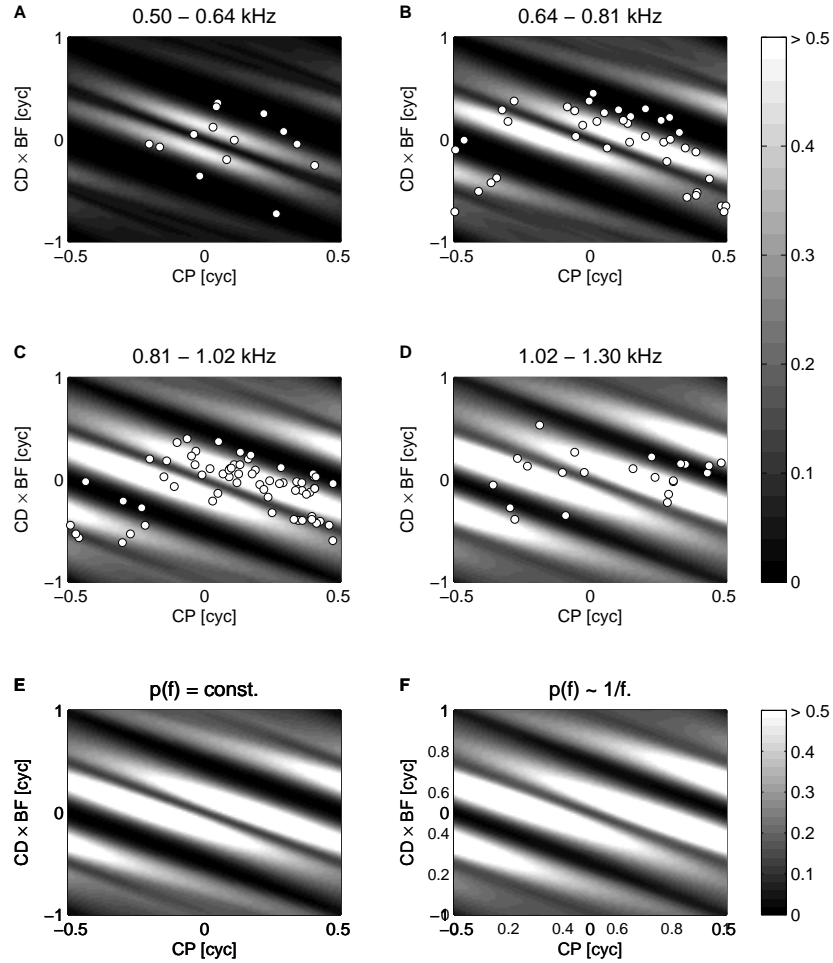

Figure S1: (A-D) Single cell mutual information for different best frequencies. White circles represent measured CP, CD × BF values for the cells in the respective best frequency band. (E,F) Single cell mutual information for uniform (E) and power-law (F) frequency distribution (E is the same grey level plot as C).
